# Supplementary material for: Is working in a cold environment associated with musculoskeletal complaints 7–8 years later? A longitudinal analysis from the Tromsø Study
Source: PubMed Central journal article supplement (PMC8068634; doi:10.1007/s00420-020-01606-6), 2020-11-23
Supplement: 420_2020_1606_MOESM1_ESM.pdf [file 420_2020_1606_MOESM1_ESM.pdf]

## Supplementary tables

Supplementary table 1 Incidence rate ratio's (IRR) and confidence intervals (CI) from Poisson regression on the imputed data.

|                              | Working in a cold environment <25% of the time<br>n=4247 | Working in a cold environment ≥25% of time<br>n=632 |                    |             |             |                             |             |
|------------------------------|----------------------------------------------------------|-----------------------------------------------------|--------------------|-------------|-------------|-----------------------------|-------------|
|                              |                                                          | Ref.                                                | Crude <sup>a</sup> |             |             | Fully adjusted <sup>b</sup> |             |
|                              |                                                          | IRR                                                 | CI                 |             | IRR         | CI                          |             |
| Any MSC                      | -                                                        | <b>1.14</b>                                         | <b>1.05</b>        | <b>1.23</b> | <b>1.12</b> | <b>1.03</b>                 | <b>1.22</b> |
| Severe MSC                   | -                                                        | 1.14                                                | 0.82               | 1.60        | 0.98        | 0.69                        | 1.39        |
| MSC in ≥3 anatomical regions | -                                                        | <b>1.28</b>                                         | <b>1.06</b>        | <b>1.56</b> | 1.07        | 0.88                        | 1.30        |

<sup>a</sup> Adjusted for age, sex, and number of MSC in Tromsø 6. Interaction term between working in a cold environment ≥25% of time and severe MSC/MSC in ≥3 anatomical regions.

<sup>b</sup> Adjusted for age, sex, number of moderate MSC, education, physical activity at work, smoking status, body mass index, and self-reported health at Tromsø 6. Interaction term between working in a cold environment ≥25% of time and severe MSC/MSC in ≥3 anatomical regions.

MSC=musculoskeletal complaints

Supplementary table 2 Sensitivity analysis for any musculoskeletal complaints (MSC), severe MSC, and MSC in  $\geq 3$  anatomical regions. Three different approaches are shown: a logistic regression, logistic regression adjusted for the 10 major occupational groups in the Norwegian version of the International Standard Classification of Occupations 88 (ISCO-88), and a model with a random intercept for each 4-digit occupational code. The odds ratio (OR), confidence intervals (CI) and Akaike information criterion (AIC) are shown for each model.

| n=1982                                                       | Crude <sup>a</sup> |             |             | Fully adjusted model <sup>b</sup> |             |             |             |      |
|--------------------------------------------------------------|--------------------|-------------|-------------|-----------------------------------|-------------|-------------|-------------|------|
|                                                              | OR                 | CI          | AIC         | OR                                | CI          | AIC         |             |      |
| <b>Any MSC</b>                                               |                    |             |             |                                   |             |             |             |      |
| Logistic model                                               | <b>1.69</b>        | <b>1.22</b> | <b>2.32</b> | 2578                              | <b>1.79</b> | <b>1.23</b> | <b>2.60</b> | 2566 |
| Logistic model adjusted for the 10 major occupational groups | <b>1.52</b>        | <b>1.07</b> | <b>2.16</b> | 2589                              | <b>1.73</b> | <b>1.17</b> | <b>2.54</b> | 2579 |
| Mixed-effects logistic model with 4-digit occupational code  | <b>1.66</b>        | <b>1.20</b> | <b>2.31</b> | 2580                              | <b>1.79</b> | <b>1.22</b> | <b>2.61</b> | 2568 |
| <b>Severe MSC</b>                                            |                    |             |             |                                   |             |             |             |      |
| Logistic model                                               | 1.46               | 0.90        | 2.36        | 1079                              | 1.18        | 0.66        | 2.12        | 1065 |
| Logistic model adjusted for the 10 major occupational groups | 1.03               | 0.60        | 1.76        | 1082                              | 1.06        | 0.58        | 1.95        | 1070 |
| Mixed-effects logistic model with 4-digit occupational code  | 1.46               | 0.90        | 2.36        | 1079                              | 1.18        | 0.66        | 2.12        | 1065 |
| <b>MSC in <math>\geq 3</math> anatomical regions</b>         |                    |             |             |                                   |             |             |             |      |
| Logistic model                                               | <b>1.71</b>        | <b>1.16</b> | <b>2.51</b> | 1725                              | 1.43        | 0.93        | 2.21        | 1714 |
| Logistic model adjusted for the 10 major occupational groups | <b>1.69</b>        | <b>1.17</b> | <b>2.43</b> | 1725                              | 1.43        | 0.93        | 2.21        | 1714 |
| Mixed-effects logistic model with 4-digit occupational code  | 1.40               | 0.93        | 2.10        | 1724                              | 1.45        | 0.93        | 2.27        | 1722 |

<sup>a</sup> Adjusted for age and number of moderate MSC at Tromsø 6.

<sup>b</sup> Adjusted for age, number of moderate MSC, education, physical activity at work, smoking status, body mass index, and self-reported health at baseline.

Supplementary table 3 Occupations for which participants reported to work 25% of the time in cold environment at the time of Tromsø 6. Sorted by frequency of workers in the occupation.

| Occupation                                                                                                              | Working in a cold environment $\geq$ 25% of the time |
|-------------------------------------------------------------------------------------------------------------------------|------------------------------------------------------|
|                                                                                                                         | Yes                                                  |
| Child-care workers                                                                                                      | 21                                                   |
| Carpenters and joiners                                                                                                  | 13                                                   |
| Stock clerks                                                                                                            | 10                                                   |
| Road workers and construction workers                                                                                   | 10                                                   |
| Earth-moving and related plant operators                                                                                | 8                                                    |
| Mail carriers and sorting clerks                                                                                        | 7                                                    |
| Fishery workers                                                                                                         | 7                                                    |
| Ships deck officers and pilots                                                                                          | 6                                                    |
| Fish-processing-machine operators                                                                                       | 6                                                    |
| Pre-primary education teaching associate professionals                                                                  | 5                                                    |
| Electricians, electrical and electronic equipment mechanics and fitters                                                 | 5                                                    |
| Civil engineering technicians                                                                                           | 4                                                    |
| Helpers and cleaners in offices and other establishments                                                                | 4                                                    |
| Directors and chief executives                                                                                          | 3                                                    |
| Nursing assistants and care                                                                                             | 3                                                    |
| Shop salespersons and other salespersons (retail)                                                                       | 3                                                    |
| Dairy and livestock producers                                                                                           | 3                                                    |
| Welders                                                                                                                 | 3                                                    |
| Motor vehicle mechanics and fitters                                                                                     | 3                                                    |
| Aircraft engine mechanics and fitters                                                                                   | 3                                                    |
| Electrical line installers, repairers, and cable jointers                                                               | 3                                                    |
| Heavy truck and lorry drivers                                                                                           | 3                                                    |
| Shipsdeck crews                                                                                                         | 3                                                    |
| Labourers in construction and maintenance, etc.                                                                         | 3                                                    |
| Officers (above the rank of captain)                                                                                    | 2                                                    |
| Other public service administrative associate professionals                                                             | 2                                                    |
| Police officers                                                                                                         | 2                                                    |
| Clerical officers                                                                                                       | 2                                                    |
| Caretakers                                                                                                              | 2                                                    |
| Bricklayers and stonemasons                                                                                             | 2                                                    |
| Concrete workers and site labourers                                                                                     | 2                                                    |
| Telegraph and telephone installers and servicers                                                                        | 2                                                    |
| Bus- and tram drivers                                                                                                   | 2                                                    |
| Garbage collectors and related labourers                                                                                | 2                                                    |
| Production and operations department managers in manufacturing, mining and quarrying, electricity, gas and water supply | 1                                                    |
| Production and operations department managers in education, health and social security                                  | 1                                                    |
| Production and operations department managers in personal care, cleaning and related services                           | 1                                                    |
| Supply and distribution department managers                                                                             | 1                                                    |
| Other department managers not elsewhere classified                                                                      | 1                                                    |

|                                                              |   |
|--------------------------------------------------------------|---|
| Transport clerks                                             | 1 |
| General managers in construction                             | 1 |
| General managers in wholesale and retail trade               | 1 |
| General managers in business services                        | 1 |
| Mining engineers, metallurgists, and related professionals   | 1 |
| Biologists, botanists, zoologists, and related professionals | 1 |
| Nursing and midwifery professionals                          | 1 |
| Secondary education teaching professionals                   | 1 |
| Other public service administrative professionals            | 1 |
| Electrical engineering technicians                           | 1 |
| Electronics and telecommunications engineering technicians   | 1 |
| Oil, mining and metallurgical technicians                    | 1 |
| Fire inspectors                                              | 1 |
| Nurses                                                       | 1 |
| Primary education teaching associate professionals           | 1 |
| Estate agents                                                | 1 |
| Technical and commercial sales representatives               | 1 |
| Appraisers, valuers, and auctioneers                         | 1 |
| Bank associate professionals                                 | 1 |
| Athletes, sportspersons and coaches                          | 1 |
| Radio and television announcers                              | 1 |
| Transport clerks                                             | 1 |
| Dentists secretaries                                         | 1 |
| Fire-fighters                                                | 1 |
| Salespersons (wholesale)                                     | 1 |
| Fish farmers, etc.                                           | 1 |
| Plumbers                                                     | 1 |
| Painters and related workers                                 | 1 |
| Chimney sweepers                                             | 1 |
| Tinsmiths, etc.                                              | 1 |
| Industrial mechanics and fitters                             | 1 |
| Technical illustrators                                       | 1 |
| Oil- and gas-processing-plant operators                      | 1 |
| Fishing tackles-machine operators                            | 1 |
| Car, taxi, and van drivers                                   | 1 |
| Labourers in manufacturing                                   | 1 |
| Storing and goods handling labourers                         | 1 |

---
